# Supplementary material
Source: PubMed Central journal article supplement (PMC3289344)
Supplement: 1115575109_pnas.201115575SI.pdf [file 1115575109_pnas.201115575SI.pdf]

# Supporting Information

Capes et al. 10.1073/pnas.1115575109

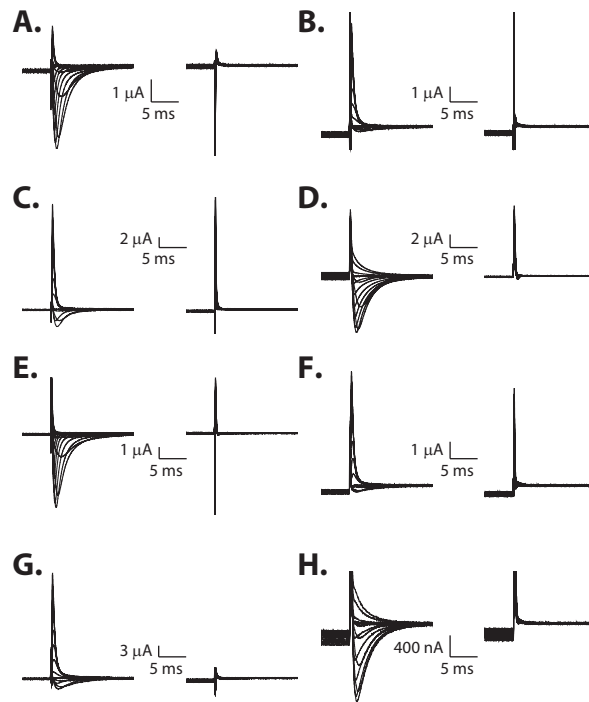

**Fig. S1.** Block of main pore currents by saturating concentrations of TTX or  $\mu$ -CTX in the charge neutralized sodium channel mutants. Family of ionic currents elicited by depolarization before (*Left*) and after (*Right*) addition of TTX for DI-CN (A), DII-CN (B), DIII-CN (C), and DIV-CN (D). Family of ionic currents elicited by depolarization before (*Left*) and after (*Right*) addition of  $\mu$ -CTX for DI-CN (E), DII-CN (F), DIII-CN (G), and DIV-CN (H). DI-CN and DIV-CN were recorded in the presence of 105 mM  $\text{Na}^+$ -Mes external solution, whereas DII-CN and DIII-CN were obtained in presence of  $\text{K}^+$ -Mes external solution. Pulse protocol is the same as reported in *Methods*.

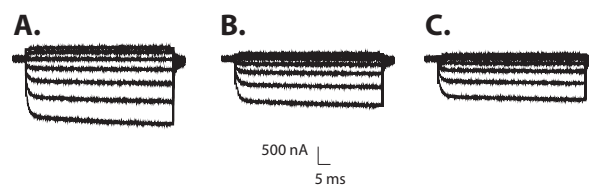

**Fig. S2.** Effect of increasing concentrations of TTX on DIV-CN gating pore currents. Family of DIV-CN gating pore currents before TTX addition (A), in 1  $\mu\text{M}$  TTX (B), and in 10  $\mu\text{M}$  TTX (C). Gating pore currents were recorded in the presence of 105 mM  $\text{Na}^+$ -Mes external solution. Pulse protocol is the same as reported in *Methods*.



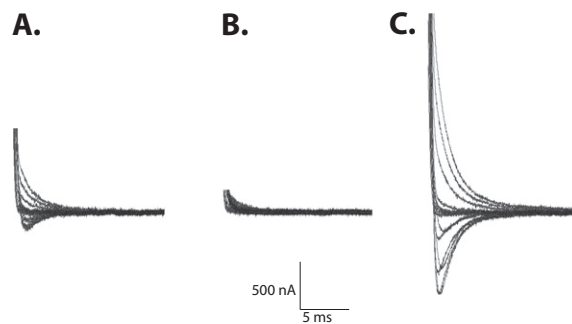

**Fig. S6.** Representative sodium current traces under varying redox conditions in D400C/E755C DIV-CN. Family of ionic currents from oocytes expressing the D400C/E755C DIV-CN mutant (A), in presence of 2 mM  $\text{H}_2\text{O}_2$  (B), and upon addition of 1 mM DTT after washout of  $\text{H}_2\text{O}_2$  (C). All traces were collected from the same oocyte in presence of 105 mM  $\text{Na}^+$ -Mes external solution using a voltage protocol listed in *Methods*.

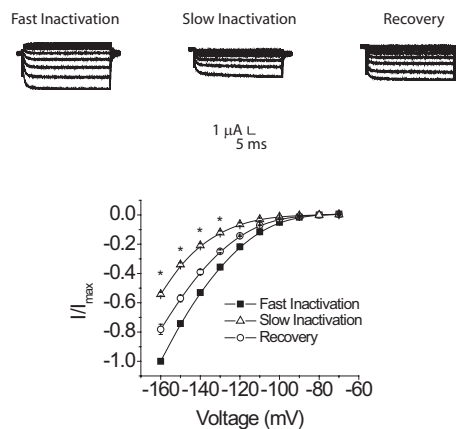

**Fig. S7.** Effect of cumulative slow inactivation on the DIV-CN gating pore currents. Family of gating pore currents (Above) is shown after fast inactivation, after a 30-s cumulative slow inactivation protocol, and after a 10-min recovery at  $-80$  mV. Normalized current–voltage plots of the DIV-CN gating pore currents (Below) before slow inactivation (filled squares), after a 30-s cumulative slow inactivation protocol (unfilled triangles), and after a 10-min recovery at  $-80$  mV (unfilled circles). The channels were pulsed from  $-120$  mV to  $-10$  mV for 20 ms to measure the ionic current and then a pulse train from  $-160$ – $60$  mV for 60 ms was collected before returning to  $-120$  mV for 20 ms. Our cumulative inactivation protocol was modified from protocols used by Cummins and Sigworth and Townsend and Horn (1, 2). For the 30-s cumulative slow inactivation protocol, the oocytes were held at  $-10$  mV for 30 s before beginning the protocol described above and were also held at  $-10$  mV for 30 s in between every voltage step. Each plot represents the mean  $\pm$  SE of six independent experiments. Statistical significance from the gating pore currents collected after fast inactivation,  $*P < 0.02$ .

1. Cummins TR, Sigworth FJ (1996) Impaired slow inactivation in mutant sodium channels. *Biophys J* 71:227–236.
2. Townsend C, Horn R (1997) Effect of alkali metal cations on slow inactivation of cardiac  $\text{Na}^+$  channels. *J Gen Physiol* 110:23–33.
